# Supplementary material for: Evolution of kinase polypharmacology across HSP90 drug discovery
Source: PubMed Central journal article supplement (PMC8550792; doi:10.1016/j.chembiol.2021.05.004), 2021-10-21

**Cell Chemical Biology, Volume 28**

**Supplemental information**

**Evolution of kinase polypharmacology  
across HSP90 drug discovery**

**Albert A. Antolin, Paul A. Clarke, Ian Collins, Paul Workman, and Bissan Al-Lazikani**

## Supplemental Information

**Figure S1. Protein-ligand interactions schemes for selected HSP90 inhibitors, related to Figure 5.** **a** Docking pose with the top MOE score ( $S = -8.20$ ) for SNX-2112 in ABL1 kinase. **b** Docking pose with the top MOE score ( $S = -8.02$ ) for Debio-0932 in ABL1 kinase. **c** Docking pose with the top MOE score ( $S = -8.73$ ) for geldanamycin in ABL1 kinase. **d** Docking pose with the top MOE score ( $S = -6.94$ ) for radicicol in ABL1 kinase. The MOE ligand interaction tool was used to generate the schematic diagrams of protein-ligand interactions.

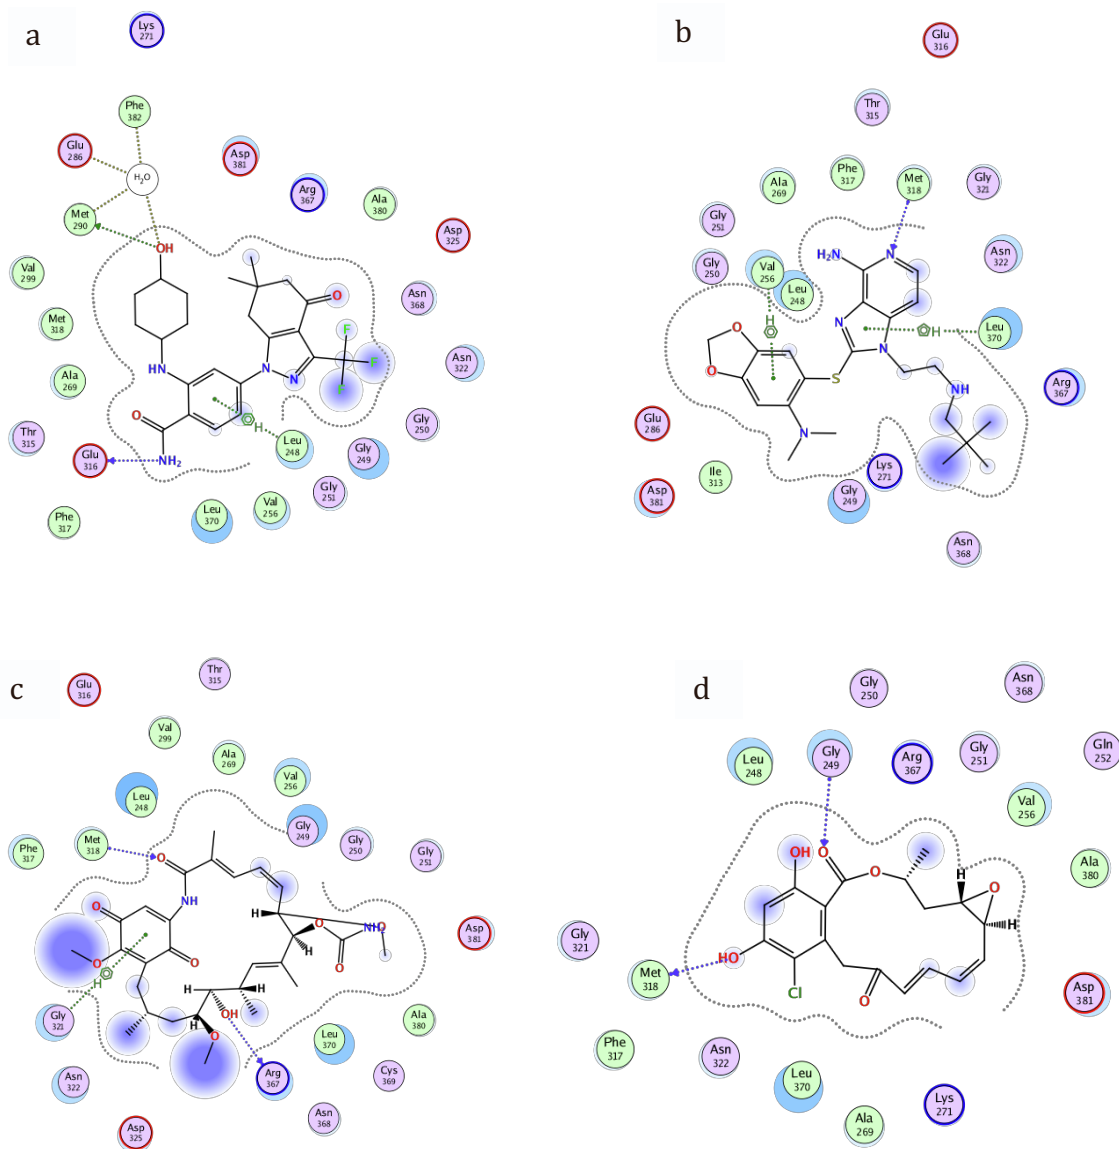

Supplement: mmc1.pdf [file mmc1.pdf]
